# Supplementary material
Source: MDPI journal article supplement (https://www.mdpi.com/2073-4395/12/10/2325)
Supplement: s1 [file s1]

Supplemental materials for Biofertilizer with *Bacillus pumilus* TUAT1 spores improves growth, productivity, and lodging resistance in forage rice.

Shin-ichiro Agake <sup>1</sup>, Yoshinari Ohwaki <sup>2</sup>, Katsuhiko Kojima <sup>3</sup>, Emon Yoshikawa <sup>3</sup>, Maria Daniela Artigas Ramirez <sup>4</sup>, Sonoko Dorothea Bellingrath-Kimura <sup>5</sup>, Tetsuya Yamada <sup>1,6</sup>, Taiichiro Ookawa <sup>6</sup>, Naoko Ohkama-Ohtsu <sup>1,6,\*</sup>, Tadashi Yokoyama <sup>7</sup>

<sup>1</sup> Institute of Global Innovation Research, Tokyo University of Agriculture and Technology, Harumi-cho 3-8-1, Fuchu-shi, Tokyo 183-8509, Japan.

<sup>2</sup> Central Region Agricultural Research Center, National Agriculture and Food Research Organization (NARO), Tsukuba, Kanondai 2-1-18, Ibaraki 305-8666, Japan.

<sup>3</sup> Faculty of Agriculture, Tokyo University of Agriculture and Technology, Saiwai-cho 3-5-8, Fuchu-shi, Tokyo 183-8509, Japan.

<sup>4</sup> Iriomote Station, Tropical Biosphere Research Center, The University of the Ryukyus, 870 Uehara, Yaeyama, Taketomi, Okinawa 907-1541, Japan.

<sup>5</sup> Leibniz Centre for Agricultural Landscape Research (ZALF), Eberswalder Str. 84, Müncheberg, 15374, Germany

<sup>6</sup> Institute of Agriculture, Tokyo University of Agriculture and Technology, Saiwai-cho 3-5-8, Fuchu-shi, Tokyo 183-8509, Japan.

<sup>7</sup> Faculty of Food and Agricultural Sciences, Fukushima University, Kanayagawa 1, Fukushima-shi, Fukushima 960-1296, Japan.

**\*Corresponding author:** Naoko Ohkama-Ohtsu. E-mail: nohtsu@cc.tuat.ac.jp

**Mailing address:** Institute of Agriculture, Tokyo University of Agriculture and Technology, Saiwaicho 3-5-8, Fuchu-shi, Tokyo 183-8509, Japan.

TEL / FAX: +81-42-367-5878

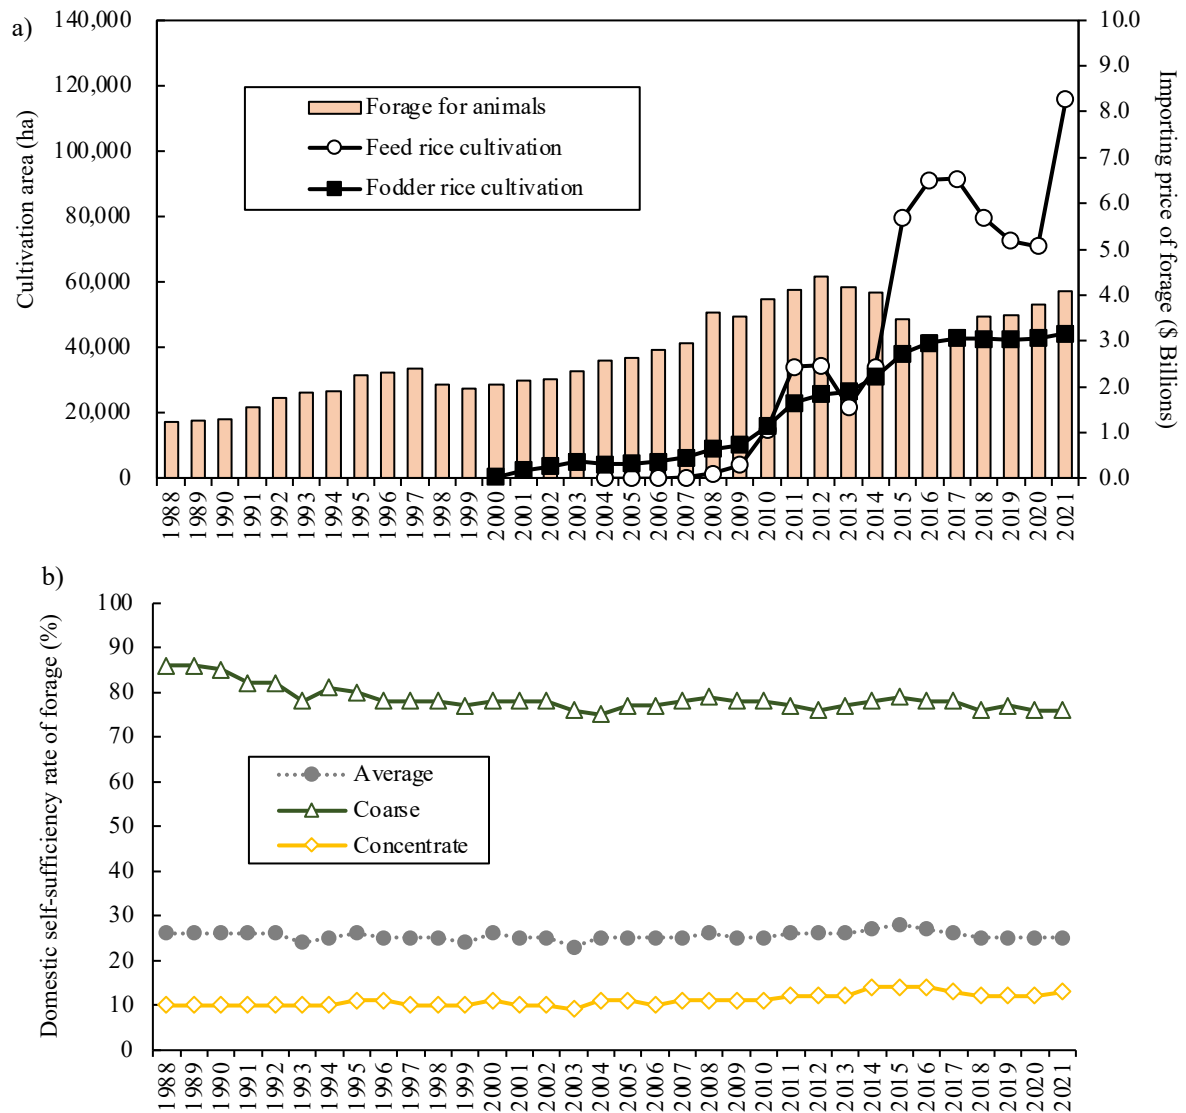

**Figure S1. Circumstances surrounding animal forage in Japan.** a) Area of the forage rice cultivation (feeds rice and fodder rice) according to the reports of the Ministry of Agriculture, Forestry and Fishers (MAFF), and the importing price of animal forage according to the Trade Statistics of Japan. The prices were converted to USD by the calendar based yearly average exchange rates reported by BOJ Time-Series Data Search. b) Domestic self-sufficiency rate of forage reported by MAFF.

**Table S1. Analyzed soil characters of the paddy field.**

| Categories                               | Unit                               | Ave. | ± | SE   |
|------------------------------------------|------------------------------------|------|---|------|
| pH (H <sub>2</sub> O)                    | -                                  | 6.3  | ± | 0.0  |
| Cation exchange capacity (CEC)           | cmol <sub>c</sub> kg <sup>-1</sup> | 13   | ± | 0.3  |
| NH <sub>3</sub> -N                       | mg kg <sup>-1</sup>                | 13   | ± | 0.5  |
| Available N                              | mg kg <sup>-1</sup>                | 73   | ± | 1.5  |
| Absorption coefficient of P              | -                                  | 683  | ± | 14.4 |
| Total P (P <sub>2</sub> O <sub>5</sub> ) | mg kg <sup>-1</sup>                | 370  | ± | 14.4 |
| Exchangeable K                           | mg kg <sup>-1</sup>                | 320  | ± | 21.8 |
| Exchangeable Ca                          | mg kg <sup>-1</sup>                | 273  | ± | 27.2 |
| Exchangeable Mg                          | mg kg <sup>-1</sup>                | 530  | ± | 17.8 |
| Humus                                    | %                                  | 4.0  | ± | 0.1  |
| Available Si                             | mg kg <sup>-1</sup>                | 160  | ± | 2.72 |
| Free iron oxides                         | %                                  | 1.1  | ± | 0.1  |
| Ca/Mg                                    | -                                  | 3.7  | ± | 0.0  |
| Mg/K                                     | -                                  | 3.9  | ± | 0.2  |
| P <sub>2</sub> O <sub>5</sub> /Mg        | -                                  | 0.7  | ± | 0.0  |
| Lime saturation factor (LSF)             | %                                  | 71   | ± | 2.6  |
| Base saturation (BS)                     | %                                  | 94   | ± | 2.6  |

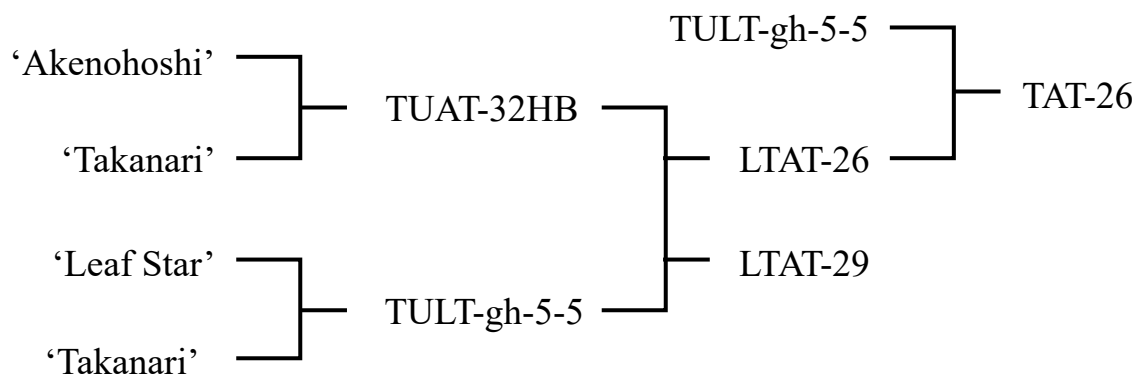

**Figure S2. Pedigree chart of the analyzed new forage rice lines (LTAT-29 and TAT-26)**

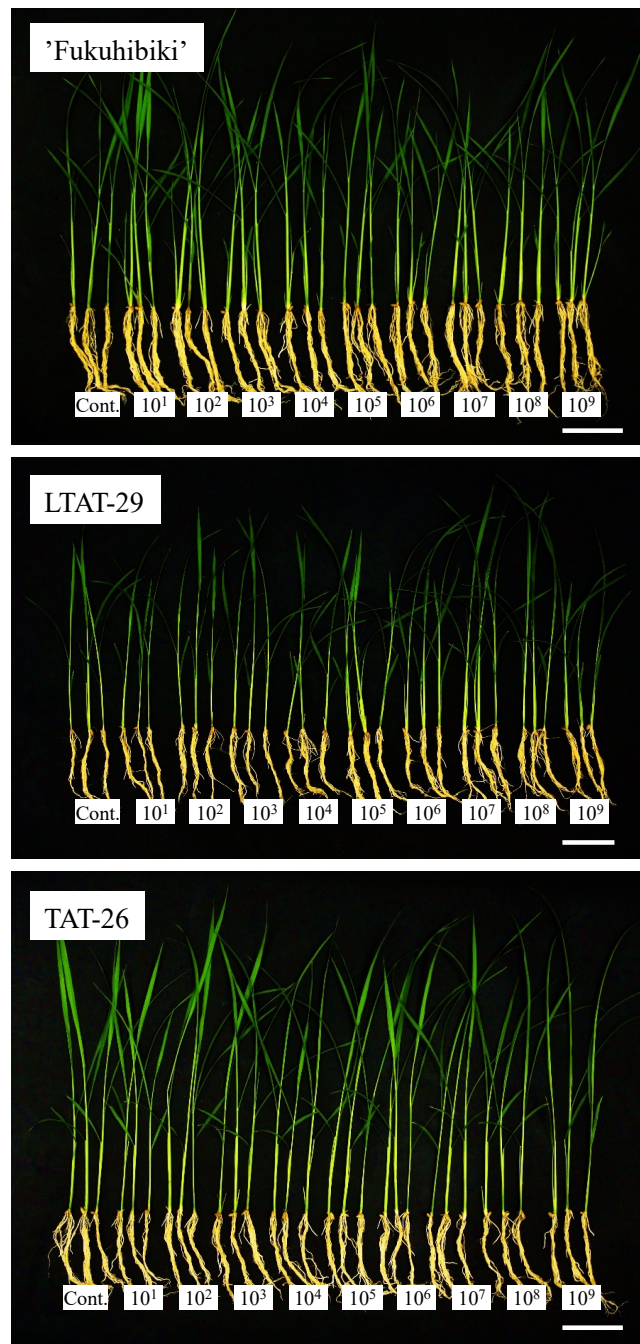

**Figure S3. Seedlings on the plant box.**

Cont.: Control (non-inoculated).

**Table S2. Results for ANOVA on the resuspended culture inoculation test (n=3).**

| ANOVA ( <i>p</i> value)  | Shoot | Root  |
|--------------------------|-------|-------|
| Cultivar                 | 0.066 | 0.005 |
| Concentration            | 0.155 | 0.000 |
| Cultivar * Concentration | 0.050 | 0.243 |

**Table S3. Results for Dunnett's test (two-sided) on the resuspended culture inoculation test (n=3).**

| Concentration ( <i>p</i> value)      | Shoot | Root  |
|--------------------------------------|-------|-------|
| 10 <sup>1</sup> CFU ml <sup>-1</sup> | 0.472 | 1.000 |
| 10 <sup>2</sup> CFU ml <sup>-1</sup> | 0.774 | 0.929 |
| 10 <sup>3</sup> CFU ml <sup>-1</sup> | 0.999 | 0.725 |
| 10 <sup>4</sup> CFU ml <sup>-1</sup> | 0.970 | 0.987 |
| 10 <sup>5</sup> CFU ml <sup>-1</sup> | 0.955 | 0.037 |
| 10 <sup>6</sup> CFU ml <sup>-1</sup> | 0.961 | 0.862 |
| 10 <sup>7</sup> CFU ml <sup>-1</sup> | 0.967 | 0.000 |
| 10 <sup>8</sup> CFU ml <sup>-1</sup> | 0.953 | 0.616 |
| 10 <sup>9</sup> CFU ml <sup>-1</sup> | 1.000 | 0.671 |

**Table S4. Summary of the seedlings inoculated with Kikuichi / Yume-bio on the nursery box at transplanting stage.**

| Variety      | Application  | Number of leaves | Shoot length<br>(cm) | Fresh weight (mg) |                | RSWL<br>(mg cm <sup>-1</sup> ) |
|--------------|--------------|------------------|----------------------|-------------------|----------------|--------------------------------|
|              |              |                  |                      | Root              | Shoot          |                                |
| 'Fukuhibiki' | Control      | 3.3 ± 0.1 **     | 12.7 ± 0.5           | 61.5 ± 7.5 *      | 74.4 ± 6.3     | 5.82 ± 0.28                    |
|              | BF           | 3.0 ± 0.0        | 18.5 ± 1.0 **        | 49.7 ± 2.4        | 105.1 ± 11.2 * | 5.66 ± 0.31                    |
|              | (BF/Control) | (0.90)           | (1.45)               | (0.81)            | (1.41)         | (0.97)                         |
| LTAT-29      | Control      | 2.5 ± 0.2 *      | 13.7 ± 0.2           | 66.5 ± 9.7        | 78.9 ± 6.5     | 5.75 ± 0.39 *                  |
|              | BF           | 2.1 ± 0.1        | 18.8 ± 1.7 *         | 65.7 ± 4.9        | 92.5 ± 5.4 *   | 4.94 ± 0.18                    |
|              | (BF/Control) | (0.81)           | (1.37)               | (0.99)            | (1.17)         | (0.86)                         |
| TAT-26       | Control      | 2.6 ± 0.1 **     | 14.6 ± 0.8           | 77.4 ± 9.4        | 81.8 ± 7.5     | 5.58 ± 0.27 **                 |
|              | BF           | 2.0 ± 0.1        | 20.5 ± 0.6 **        | 71.7 ± 10.1       | 91.0 ± 9.0     | 4.42 ± 0.30                    |
|              | (BF/Control) | (0.79)           | (1.40)               | (0.93)            | (1.11)         | (0.79)                         |

'Fukuhibiki' was harvested at 21 days after sowing. LTAT-29 and TAT-26 were harvested at 14 days after sowing. BF: Biofertilizer, RSWL: Ratio of shoot fresh weight to the shoot length. \* and \*\* indicate significant differences at  $p \leq 0.05$  and 0.01 levels between control and biofertilizer application in each treatment, respectively. Standard deviation (SD) was shown (*t*-test, two-sided). n = 3.



**Table S5. Colonized numbers of *B. pumilus* TUAT1 at basement of the root at the transplanting period.**

| Number of Bacteria (CFU g <sup>-1</sup> ) | 'Fukuhibiki'       | LTAT-29            | TAT-26             |
|-------------------------------------------|--------------------|--------------------|--------------------|
| Total                                     | $5.40 \times 10^5$ | $3.10 \times 10^5$ | $1.70 \times 10^5$ |
| Spores                                    | $2.80 \times 10^4$ | $1.10 \times 10^4$ | $4.60 \times 10^4$ |
| Vegetative cells                          | $5.12 \times 10^5$ | $2.99 \times 10^5$ | $1.24 \times 10^5$ |

CFU: Colony forming unit.

**Table S6. Summary plant growth surveyed after 8 weeks transplanting.**

| Variety                       | Distance | Fertilization | TN (m <sup>-2</sup> ) |         |              | Height (cm) |      |              | SPAD    |        |              |
|-------------------------------|----------|---------------|-----------------------|---------|--------------|-------------|------|--------------|---------|--------|--------------|
|                               |          |               | Control               | BF      | (BF/Control) | Control     | BF   | (BF/Control) | Control | BF     | (BF/Control) |
| 'Fukuhibiki'                  | 15 × 30  | N2            | 259.7                 | 301.9   | (1.16)       | 56.9        | 62.0 | (1.09)       | 40.1    | 42.3   | (1.06)       |
| 'Fukuhibiki'                  | 15 × 30  | N4            | 261.2                 | 324.1 * | (1.24)       | 59.0        | 59.2 | (1.00)       | 42.7    | 42.5   | (1.00)       |
| 'Fukuhibiki'                  | 30 × 30  | N2            | 181.7                 | 197.2   | (1.09)       | 60.3        | 61.9 | (1.03)       | 42.0    | 42.3   | (1.01)       |
| 'Fukuhibiki'                  | 30 × 30  | N4            | 193.1                 | 173.9   | (0.90)       | 62.9 *      | 57.4 | (0.91)       | 42.4    | 42.0   | (0.99)       |
| LTAT-29                       | 15 × 30  | N2            | 196.8                 | 252.3   | (1.28)       | 63.9        | 67.0 | (1.05)       | 40.1    | 42.2   | (1.05)       |
| LTAT-29                       | 15 × 30  | N4            | 241.2                 | 219.0   | (0.91)       | 65.0        | 64.2 | (0.99)       | 41.4    | 43.9   | (1.06)       |
| LTAT-29                       | 30 × 30  | N2            | 138.0                 | 139.5   | (1.01)       | 63.0        | 68.9 | (1.09)       | 40.0    | 43.2 * | (1.08)       |
| LTAT-29                       | 30 × 30  | N4            | 133.6                 | 105.1   | (0.79)       | 64.1        | 62.0 | (0.97)       | 43.1    | 44.1   | (1.02)       |
| TAT-26                        | 15 × 30  | N2            | 136.9                 | 125.8   | (0.92)       | 75.0        | 82.2 | (1.10)       | 45.3    | 44.5   | (0.98)       |
| TAT-26                        | 15 × 30  | N4            | 145.0                 | 142.8   | (0.98)       | 72.5        | 75.6 | (1.04)       | 46.3    | 46.7   | (1.01)       |
| TAT-26                        | 30 × 30  | N2            | 97.7                  | 96.6    | (0.99)       | 78.7        | 81.1 | (1.03)       | 47.3    | 46.5   | (0.98)       |
| TAT-26                        | 30 × 30  | N4            | 93.2                  | 99.2    | (1.06)       | 77.1        | 73.6 | (0.95)       | 46.7    | 47.7   | (1.02)       |
| ANOVA ( <i>p</i> value)       |          |               |                       |         |              |             |      |              |         |        |              |
| Biofertilizer                 |          |               | n.s.                  |         |              | n.s.        |      |              | 0.008   |        |              |
| Variety                       |          |               | < 0.000               |         |              | < 0.000     |      |              | < 0.000 |        |              |
| Distance                      |          |               | < 0.000               |         |              | n.s.        |      |              | 0.024   |        |              |
| Fertilization                 |          |               | n.s.                  |         |              | 0.002       |      |              | 0.001   |        |              |
| Biofertilizer * Variety       |          |               | 0.027                 |         |              | n.s.        |      |              | 0.019   |        |              |
| Biofertilizer * Distance      |          |               | 0.006                 |         |              | 0.028       |      |              | n.s.    |        |              |
| Biofertilizer * Fertilization |          |               | 0.049                 |         |              | < 0.000     |      |              | n.s.    |        |              |

TN: Tillers number. BF: Biofertilizer. n.s.: No significance. \* and \*\* indicate significant differences at  $p \leq 0.05$  and 0.01 levels between control and biofertilizer application in each treatment, respectively (t-test, two-sided). n = 3.

**Table S7. Summary plant growth surveyed after 13 weeks transplanting.**

| Variety                       | Distance | Fertilization | TN (m <sup>-2</sup> ) |          |              | Height (cm) |         |              | SPAD    |         |              |
|-------------------------------|----------|---------------|-----------------------|----------|--------------|-------------|---------|--------------|---------|---------|--------------|
|                               |          |               | Control               | BF       | (BF/Control) | Control     | BF      | (BF/Control) | Control | BF      | (BF/Control) |
| 'Fukuhibiki'                  | 15 × 30  | N2            | 244.2                 | 290.1    | (1.19)       | 90.1        | 94.7    | (1.05)       | 34.4    | 35.3    | (1.02)       |
| 'Fukuhibiki'                  | 15 × 30  | N4            | 250.9                 | 304.1 ** | (1.21)       | 94.1        | 96.5 *  | (1.03)       | 36.7    | 38.3    | (1.04)       |
| 'Fukuhibiki'                  | 30 × 30  | N2            | 176.9                 | 190.9    | (1.08)       | 94.1        | 97.2 *  | (1.03)       | 39.0    | 42.1 ** | (1.08)       |
| 'Fukuhibiki'                  | 30 × 30  | N4            | 196.5                 | 196.5    | (1.00)       | 98.3 *      | 93.5    | (0.95)       | 41.6    | 42.6 *  | (1.02)       |
| LTAT-29                       | 15 × 30  | N2            | 177.6                 | 216.8 *  | (1.22)       | 96.3        | 102.5 * | (1.06)       | 30.1    | 32.0 ** | (1.06)       |
| LTAT-29                       | 15 × 30  | N4            | 216.8                 | 239.0    | (1.10)       | 99.2        | 98.7    | (1.00)       | 32.1    | 36.1 *  | (1.13)       |
| LTAT-29                       | 30 × 30  | N2            | 145.0                 | 154.7    | (1.07)       | 99.1        | 101.6   | (1.02)       | 33.5    | 34.2    | (1.02)       |
| LTAT-29                       | 30 × 30  | N4            | 162.1                 | 177.2    | (1.09)       | 98.5        | 97.3    | (0.99)       | 34.5    | 39.4 ** | (1.14)       |
| TAT-26                        | 15 × 30  | N2            | 117.7                 | 127.3    | (1.08)       | 124.5       | 127.6   | (1.03)       | 38.5    | 39.2    | (1.02)       |
| TAT-26                        | 15 × 30  | N4            | 131.0                 | 133.9    | (1.02)       | 122.9       | 125.2   | (1.02)       | 41.3    | 39.4    | (0.95)       |
| TAT-26                        | 30 × 30  | N2            | 91.0                  | 101.0    | (1.11)       | 130.2       | 130.5   | (1.00)       | 42.8    | 42.1    | (0.98)       |
| TAT-26                        | 30 × 30  | N4            | 106.9                 | 103.6    | (0.97)       | 127.3       | 124.9   | (0.98)       | 46.2    | 44.1    | (0.95)       |
| ANOVA ( <i>p</i> value)       |          |               |                       |          |              |             |         |              |         |         |              |
| Biofertilizer                 |          |               | < 0.000               |          |              | 0.024       |         |              | 0.003   |         |              |
| Variety                       |          |               | < 0.000               |          |              | < 0.000     |         |              | < 0.000 |         |              |
| Distance                      |          |               | < 0.000               |          |              | 0.004       |         |              | < 0.000 |         |              |
| Fertilization                 |          |               | < 0.000               |          |              | n.s.        |         |              | < 0.000 |         |              |
| Biofertilizer * Variety       |          |               | n.s.                  |          |              | n.s.        |         |              | < 0.000 |         |              |
| Biofertilizer * Distance      |          |               | 0.010                 |          |              | 0.003       |         |              | n.s.    |         |              |
| Biofertilizer * Fertilization |          |               | n.s.                  |          |              | 0.001       |         |              | n.s.    |         |              |

TN: Tillers number. BF: Biofertilizer. n.s.: No significance. \* and \*\* indicate significant differences at  $p \leq 0.05$  and 0.01 levels between control and biofertilizer application in each treatment, respectively (t-test, two-sided). n = 3.

**Table S8. Summary of the slope of the approximation straight lines, regression analysis ( $R^2$ ) and Pearson correlation test (two-sided) for yield components of ‘Fukuhibiki’ and LTAT-29.**

|                   | NSP  |             | PRR  |             | WBR   |      | TPN         |      | GBRY |      |
|-------------------|------|-------------|------|-------------|-------|------|-------------|------|------|------|
|                   | F    | L           | F    | L           | F     | L    | F           | L    | F    | L    |
| Slope             | 0.11 | 1.13        | 0.21 | 1.51        | -0.89 | 2.36 | 1.59        | 0.93 | 1.12 | 1.75 |
| $R^2$             | 0.03 | 0.91        | 0.03 | 0.97        | 0.24  | 0.66 | 0.93        | 0.85 | 0.70 | 0.73 |
| Pearson (P value) | 0.83 | <b>0.04</b> | 0.84 | <b>0.01</b> | 0.51  | 0.19 | <b>0.03</b> | 0.08 | 0.16 | 0.15 |

NSP: Number of spikelets in a panicle, PRR: Percentage of ripening rice seeds to total numbers, WBR: weights of one thousand gross brown rice, TPN: Total panicle numbers in a square meter, GBRY: Gross brown rice yield in 100 square meters. F: ‘Fukuhibiki’, L: LTAT-29.

**Table S9. The quality as WCS, line TAT-26.**

| Distance                      | Fertilization | Biofertilizer | CP      | CFA     | CFI     | CA     | NFE     | NFC     | ADF     | NDF     | OCC    | OCW    | Oa     | Ob     |
|-------------------------------|---------------|---------------|---------|---------|---------|--------|---------|---------|---------|---------|--------|--------|--------|--------|
| 15 × 30                       | N2            | Control       | 51.8    | 16.4 *  | 229     | 125    | 578     | 366     | 275     | 456     | 500    | 500 *  | 83.6   | 417    |
| 15 × 30                       | N2            | BF            | 50.8    | 14.3    | 222     | 120    | 593     | 388     | 276     | 443     | 522 *  | 478    | 75.8   | 402    |
|                               |               | (BF/Control)  | (0.98)  | (0.88)  | (0.97)  | (0.96) | (1.03)  | (1.06)  | (1.00)  | (0.97)  | (1.04) | (0.96) | (0.90) | (0.96) |
| 15 × 30                       | N4            | Control       | 58.7    | 15.3 ** | 250     | 120    | 557     | 314     | 311     | 509 *   | 464    | 536 *  | 105 *  | 431    |
| 15 × 30                       | N4            | BF            | 59.9    | 13.7    | 243     | 125 *  | 558     | 325     | 303     | 492     | 488 *  | 512    | 84.0   | 428    |
|                               |               | (BF/Control)  | (1.02)  | (0.93)  | (0.97)  | (1.04) | (1.00)  | (1.04)  | (0.97)  | (0.97)  | (1.05) | (0.96) | (0.80) | (0.99) |
| 30 × 30                       | N2            | Control       | 49.9    | 12.7    | 238     | 122    | 577     | 356     | 299     | 475     | 491    | 509    | 81.1   | 428    |
| 30 × 30                       | N2            | BF            | 45.5    | 13.3    | 240     | 120    | 581     | 358     | 291     | 478     | 491    | 509    | 77.1   | 432    |
|                               |               | (BF/Control)  | (0.92)  | (1.00)  | (1.01)  | (0.98) | (1.01)  | (1.01)  | (0.973) | (1.01)  | (1.00) | (1.00) | (0.92) | (1.01) |
| 30 × 30                       | N4            | Control       | 61.9    | 13.7    | 248     | 131    | 545     | 315     | 308 *   | 495     | 480    | 520    | 87.6   | 432    |
| 30 × 30                       | N4            | BF            | 61.2    | 14.0    | 248     | 146    | 531     | 297     | 301     | 498     | 478    | 522    | 86.6   | 435    |
|                               |               | (BF/Control)  | (0.98)  | (1.00)  | (1.00)  | (1.11) | (0.97)  | (0.94)  | (0.98)  | (1.01)  | (1.00) | (1.00) | (0.99) | (1.01) |
| ANOVA ( <i>p</i> value)       |               |               |         |         |         |        |         |         |         |         |        |        |        |        |
| Biofertilizer                 |               |               | n.s.    | 0.050   | n.s.    | n.s.   | n.s.    | n.s.    | n.s.    | n.s.    | n.s.   | n.s.   | 0.046  | n.s.   |
| Distance                      |               |               | n.s.    | 0.001   | 0.016   | n.s.   | 0.006   | 0.009   | n.s.    | 0.042   | n.s.   | n.s.   | n.s.   | n.s.   |
| Fertilization                 |               |               | < 0.000 | n.s.    | < 0.000 | 0.037  | < 0.000 | < 0.000 | < 0.000 | < 0.000 | 0.001  | 0.001  | 0.010  | n.s.   |
| Biofertilizer * Distance      |               |               | n.s.    | 0.004   | n.s.    | n.s.   | n.s.    | n.s.    | n.s.    | n.s.    | 0.040  | 0.040  | n.s.   | n.s.   |
| Biofertilizer * Fertilization |               |               | n.s.    | n.s.    | n.s.    | n.s.   | n.s.    | n.s.    | n.s.    | n.s.    | n.s.   | n.s.   | n.s.   | n.s.   |

The unit of each value is milligram per gram (mg g<sup>-1</sup>). CP: Crude protein, CFA: Crude fat, CFI: Crude fiber, CA: Crude ash, NFE: Nitrogen free extract, NFC: Non-fiber carbohydrate, ADF: Acid detergent fiber, NDF: Neutral detergent fiber, OCC: Organic cellular content, OCW: Organic cell wall, Oa: Organic a fraction in OCW (hydrolyzed rapidly by cellulase), Ob: Organic b fraction in OCW (resistant to cellulase digestion). BF: Biofertilizer. n.s.: No significance. \* and \*\* indicate significant differences at  $p \leq 0.05$  and 0.01 levels between control and biofertilizer application in each treatment, respectively (t-test, two-sided). n = 3.

**Table S10. Summary of effects of BF inoculation on the lodging factors of rice.**

| Variety                       | Distance | Fertilization | Biofertilizer | Plant height<br>(cm) | Shoot FW<br>(kg) | Culm number<br>(hill <sup>-1</sup> ) | Pushing resistance<br>(N hill <sup>-1</sup> ) | Pushing resistance<br>(N culm <sup>-1</sup> ) | Bending moment<br>(kg · cm) | Lodging index<br>(%) |
|-------------------------------|----------|---------------|---------------|----------------------|------------------|--------------------------------------|-----------------------------------------------|-----------------------------------------------|-----------------------------|----------------------|
| 'Fukuhibiki'                  | 15 × 30  | N2            | Control       | 90.5                 | 0.175            | 14 *                                 | 8.68                                          | 0.60                                          | 15.9                        | 133.6 *              |
| 'Fukuhibiki'                  | 15 × 30  | N2            | BF            | 96.6 **              | 0.169            | 12                                   | 10.46                                         | 0.89 **                                       | 16.3                        | 103.2                |
|                               |          |               | (BF/Control)  | (1.07)               | (0.97)           | (0.83)                               | (1.21)                                        | (1.49)                                        | (1.03)                      | (0.77)               |
| 'Fukuhibiki'                  | 15 × 30  | N4            | Control       | 90.2                 | 0.171            | 12                                   | 9.61                                          | 0.80                                          | 15.4                        | 105.0                |
| 'Fukuhibiki'                  | 15 × 30  | N4            | BF            | 92.8                 | 0.162            | 14 **                                | 10.17                                         | 0.74                                          | 15.1                        | 102.7                |
|                               |          |               | (BF/Control)  | (1.03)               | (0.947)          | (1.16)                               | (1.06)                                        | (0.92)                                        | (0.98)                      | (0.98)               |
| 'Fukuhibiki'                  | 30 × 30  | N2            | Control       | 93.3                 | 0.253            | 18                                   | 13.64                                         | 0.76                                          | 23.6                        | 114.9                |
| 'Fukuhibiki'                  | 30 × 30  | N2            | BF            | 101.5 **             | 0.337 **         | 20                                   | 18.94 **                                      | 0.94 **                                       | 34.2 **                     | 122.1                |
|                               |          |               | (BF/Control)  | (1.09)               | (1.33)           | (1.13)                               | (1.39)                                        | (1.23)                                        | (1.45)                      | (1.06)               |
| 'Fukuhibiki'                  | 30 × 30  | N4            | Control       | 104.6 *              | 0.207            | 19                                   | 16.39                                         | 0.86                                          | 21.7                        | 86.4                 |
| 'Fukuhibiki'                  | 30 × 30  | N4            | BF            | 93.8                 | 0.228            | 17                                   | 15.71                                         | 0.92                                          | 21.4                        | 98.7                 |
|                               |          |               | (BF/Control)  | (0.90)               | (1.10)           | (0.91)                               | (0.96)                                        | (1.07)                                        | (0.99)                      | (1.14)               |
| LTAT-29                       | 15 × 30  | N2            | Control       | 132.7                | 0.146            | 6                                    | 9.22                                          | 1.54                                          | 19.4                        | 140.8                |
| LTAT-29                       | 15 × 30  | N2            | BF            | 143.7 **             | 0.194 **         | 7 *                                  | 10.61                                         | 1.48                                          | 28.0 **                     | 183.5 *              |
|                               |          |               | (BF/Control)  | (1.08)               | (1.33)           | (1.21)                               | (1.15)                                        | (0.96)                                        | (1.45)                      | (1.30)               |
| LTAT-29                       | 15 × 30  | N4            | Control       | 142.8                | 0.179            | 8                                    | 7.78                                          | 0.98                                          | 25.5                        | 226.7 **             |
| LTAT-29                       | 15 × 30  | N4            | BF            | 146.2 *              | 0.187            | 9                                    | 12.38 **                                      | 1.39 **                                       | 27.3                        | 148.6                |
|                               |          |               | (BF/Control)  | (1.02)               | (1.04)           | (1.13)                               | (1.59)                                        | (1.42)                                        | (1.07)                      | (0.66)               |
| LTAT-29                       | 30 × 30  | N2            | Control       | 147.2                | 0.287            | 12                                   | 19.32                                         | 1.69 **                                       | 42.3                        | 145.6                |
| LTAT-29                       | 30 × 30  | N2            | BF            | 150.9 *              | 0.330            | 14                                   | 19.42                                         | 1.37                                          | 50.2                        | 178.6 **             |
|                               |          |               | (BF/Control)  | (1.03)               | (1.15)           | (1.20)                               | (1.01)                                        | (0.81)                                        | (1.19)                      | (1.23)               |
| LTAT-29                       | 30 × 30  | N4            | Control       | 150.2 **             | 0.269            | 12                                   | 14.87                                         | 1.26                                          | 40.4                        | 182.8 **             |
| LTAT-29                       | 30 × 30  | N4            | BF            | 143.5                | 0.284            | 13                                   | 20.66 **                                      | 1.56 **                                       | 40.7                        | 132.5                |
|                               |          |               | (BF/Control)  | (0.96)               | (1.06)           | (1.12)                               | (1.39)                                        | (1.24)                                        | (1.01)                      | (0.73)               |
| TAT-26                        | 15 × 30  | N2            | Control       | 148.4 *              | 0.214            | 6                                    | 9.56                                          | 1.55                                          | 31.7                        | 247.0 *              |
| TAT-26                        | 15 × 30  | N2            | BF            | 144.3                | 0.224            | 7                                    | 13.39 **                                      | 2.10 *                                        | 32.3                        | 164.7                |
|                               |          |               | (BF/Control)  | (0.97)               | (1.05)           | (1.05)                               | (1.40)                                        | (1.36)                                        | (1.02)                      | (0.67)               |
| TAT-26                        | 15 × 30  | N4            | Control       | 151.4                | 0.203            | 6                                    | 11.09                                         | 1.75                                          | 30.7                        | 191.6                |
| TAT-26                        | 15 × 30  | N4            | BF            | 150.6                | 0.245 **         | 7 *                                  | 14.27 *                                       | 1.93                                          | 36.8 **                     | 181.8                |
|                               |          |               | (BF/Control)  | (1.00)               | (1.20)           | (1.19)                               | (1.29)                                        | (1.10)                                        | (1.20)                      | (0.95)               |
| TAT-26                        | 30 × 30  | N2            | Control       | 156.7 **             | 0.342            | 8                                    | 18.29                                         | 2.29                                          | 53.6                        | 195.0                |
| TAT-26                        | 30 × 30  | N2            | BF            | 151.5                | 0.374            | 10 *                                 | 21.17                                         | 2.10                                          | 56.6                        | 181.9                |
|                               |          |               | (BF/Control)  | (0.97)               | (1.10)           | (1.28)                               | (1.16)                                        | (0.92)                                        | (1.06)                      | (0.93)               |
| TAT-26                        | 30 × 30  | N4            | Control       | 154.7                | 0.308            | 9                                    | 20.15                                         | 2.35                                          | 48.1                        | 159.6                |
| TAT-26                        | 30 × 30  | N4            | BF            | 158.4                | 0.355 *          | 10                                   | 20.44                                         | 2.23                                          | 56.3 *                      | 204.8                |
|                               |          |               | (BF/Control)  | (1.02)               | (1.15)           | (1.12)                               | (1.01)                                        | (0.95)                                        | (1.17)                      | (1.28)               |
| ANOVA ( <i>p</i> value)       |          |               |               |                      |                  |                                      |                                               |                                               |                             |                      |
| Biofertilizer                 |          |               |               | 0.050                | < 0.000          | 0.002                                | < 0.000                                       | 0.046                                         | < 0.000                     | 0.024                |
| Variety                       |          |               |               | < 0.000              | < 0.000          | < 0.000                              | < 0.000                                       | < 0.000                                       | < 0.000                     | < 0.000              |
| Distance                      |          |               |               | < 0.000              | < 0.000          | < 0.000                              | < 0.000                                       | < 0.000                                       | < 0.000                     | n.s.                 |
| Fertilization                 |          |               |               | 0.035                | 0.001            | n.s.                                 | n.s.                                          | n.s.                                          | 0.029                       | n.s.                 |
| Biofertilizer * Variety       |          |               |               | 0.010                | n.s.             | n.s.                                 | n.s.                                          | n.s.                                          | n.s.                        | n.s.                 |
| Biofertilizer * Distance      |          |               |               | n.s.                 | n.s.             | n.s.                                 | n.s.                                          | 0.027                                         | n.s.                        | 0.007                |
| Biofertilizer * Fertilization |          |               |               | 0.003                | n.s.             | n.s.                                 | n.s.                                          | n.s.                                          | n.s.                        | n.s.                 |

FW: Fresh weight. BF: Biofertilizer. n.s.: No significance. \* and \*\* indicate significant differences at  $p \leq 0.05$  and 0.01 levels between control and biofertilizer application in each treatment, respectively (t-test, two-sided). n = 10.
